# Supplementary material for: Sarocladione, a unique 5,10:8,9-diseco-steroid from the deep-sea-derived fungusSarocladium kiliense
Source: Royal Society of Chemistry journal article supplement (doi:10.1039/c9ob01159e), 2019-01-01
Supplement: c9ob01159e1.pdf [file c9ob01159e1.pdf]

## Supplementary Data

### **Sarocladione, a unique 5,10:8,9-diseco-steroid from the deep-sea-derived fungus *Sarocladium kiliense***

Shao-Qiang Fan,<sup>a,b</sup> Chun-Lan Xie,<sup>b</sup> Jin-Mei Xia,<sup>b</sup> Cui-Ping Xing,<sup>b</sup> Zhu-Hua Luo,<sup>b</sup>  
Zongze Shao,<sup>b</sup> Xiao-Jun Yan,<sup>a</sup> Shan He<sup>a</sup> and Xian-Wen Yang\*<sup>b</sup>

<sup>a</sup> *Li Dak Sum Yip Yio Chin Kenneth Li Marine Biopharmaceutical Research Center,  
Ningbo University, Ningbo 315211, China.*

<sup>b</sup> *Key Laboratory of Marine Biogenetic Resources, Third Institute of Oceanography,  
Ministry of Natural Resources, 184 Daxue Road, Xiamen 361005, China. E-mail:  
yangxianwen@tio.org.cn*

## Content

### Detailed experimental procedures

### Computational methods

### Energies and coordinates

### Experimental and computed NMR chemical shifts

**Table S1** Energies of compound **1** at MMFF94 force field.

**Table S2** Energies of compound **1** at B3LYP/6-311+G(d,p) in gas phase.

**Table S3** Standard orientations of compound **1** at B3LYP/6-311+G(d,p) level in gas phase for NMR calculations.

**Table S4** Statistics of Ordinary Least Squares (OLS) linear regression of experimental and computed  $^{13}\text{C}$ -NMR chemical shifts.

**Table S5** Experimental and computed  $^{13}\text{C}$  NMR chemical shifts.

**Table S6** Experimental and computed  $^1\text{H}$  NMR chemical shifts.

**Figure S1** Linear regression fitting of computed  $^{13}\text{C}$  NMR chemical shifts of the four configurations **a–d** to experimental values.

**Figure S2** Linear regression fitting of computed  $^1\text{H}$  NMR chemical shifts of the four configurations **a–d** to experimental values.

**Figure S3.** Chemical structures of all isolated known compounds (**2–21**).

**Figure S4.**  $^1\text{H}$  NMR spectrum of compound **1** in  $\text{CDCl}_3$ .

**Figure S5.**  $^{13}\text{C}$  NMR spectrum of compound **1** in  $\text{CDCl}_3$ .

**Figure S6.** HSQC NMR spectrum of compound **1** in  $\text{CDCl}_3$ .

**Figure S7.**  $^1\text{H}$ - $^1\text{H}$  COSY NMR spectrum of compound **1** in  $\text{CDCl}_3$ .

**Figure S8.** HMBC NMR spectrum of compound **1** in  $\text{CDCl}_3$ .

**Figure S9.** NOESY NMR spectrum of compound **1** in  $\text{CDCl}_3$ .

## Detailed experimental procedures

**General Experimental Procedures.** Optical rotations were measured with an Anton Paar MCP 500 polarimeter. NMR spectra were recorded on a Bruker Avance II 400 MHz spectrometer with TMS as an internal standard. HRESIMS were completed on a Waters Xevo G2 Q-TOF spectrometer. Materials for column chromatography were silica gel (Qingdao Marine Chemistry Co. Ltd., Qingdao, China), Sephadex LH-20 (Amersham Pharmacia Biotech AB, Uppsala, Sweden), and ODS (50  $\mu$ m, Daiso, Japan).

**Fungus Material.** *Sarocladium killiense* was isolated from a deep-sea sediment sample of the Northeast Pacific Ocean (−5070 m). It was provided by the Marine Culture Collection of China (MCCC). And the voucher specimen of this strain was preserved there with the accession number of 3A00626.

**Cultivation and Extraction.** *Sarocladium killiense* was cultured on a PDA plate at 28 °C for 5 d. The fresh mycelia and spores were inoculated to 500 mL Erlenmeyer flasks ( $\times 16$ ) containing 125 mL A5 medium (4 g D-glucose, 10 g malt extract, 4 g yeast extract, 30 g marine salt, and 1 L water), and was cultured in a rotary shaker with 160 rpm at 28 °C for 4 days. Then the spore cultures were used to inoculate 100  $\times$  1 L Erlenmeyer flasks containing 100 g of oats and 120 mL of distilled water to perform the large-scale fermentation. After 30 days, the fermented broth was extracted with EtOAc for five times. The organic solvent was evaporated and defatted by partitioning with petroleum ether (PE) to afford a crude extract.

**Isolation and Purification.** The crude extract (106.5 g) was subjected to medium pressure liquid chromatography (MPLC) over silica gel eluting with gradient  $\text{CH}_2\text{Cl}_2$ -MeOH to give six fractions (Fr.1 - Fr.6). Fraction Fr.1 (10.3 g) was further MPLC over ODS (MeOH- $\text{H}_2\text{O}$ , 50:50 $\rightarrow$ 100:0) and column chromatography (CC) over Sephadex LH - 20 ( $\text{CH}_2\text{Cl}_2$ -MeOH, 1:1). Further purification by preparative TLC (PE-EtOAc, 20:1 and 10:1) afforded **1** (8.5 mg), **5** (186.9 mg), and **10** (12.6 mg). Fraction Fr.2 (8.0 g) was subjected to MPLC over ODS (MeOH- $\text{H}_2\text{O}$ , 80:20 $\rightarrow$ 100:0) and CC over Sephadex LH-20 (MeOH). Further purification by CC over silica gel (PE-EtOAc, 30:1) gave **6** (17.2 mg) and by preparative TLC (PE-EtOAc, 10:1) provided **7** (8.2 mg). Fraction Fr.3 (13.0 g) was divided into 14 subfractions (Fr.3.1 -

Fr.3.14) by CC over ODS (MeOH-H<sub>2</sub>O, 5:95→100:0) and Sephadex LH - 20 (CH<sub>2</sub>Cl<sub>2</sub>-MeOH, 1:1). Compounds **3** (14.8 mg), **4** (9.7 mg), **18** (21.1 mg), and **19** (20.7 mg) were obtained from Fr.3.1 (269.5 mg), Fr.3.6 (1028.3 mg) and Fr.3.7 (42.3 mg) after purification by CC over silica gel (PE-EtOAc, 3:1; 2:1; 20:1 and PE-acetone, 10:1). Compounds **2** (59.6 mg), **8** (8.4 mg), **11** (4.8 mg), **15** (5.2 mg), **16** (36.7 mg), **17** (16.0 mg), and **20** (31.9 mg) were obtained from Fr.3.2 (102.7 mg), Fr.3.3 (122.6 mg), Fr.3.4 (68.4 mg), Fr.3.5 (80.8 mg), and Fr.3.11 (336.6 mg) by preparative TLC using PE-EtOAc (1:1; 10:1; 20:1; 30:1) or dichloromethane-acetone (5:1; 20:1). Compounds **9** (15.0 mg), **12** (14.0 mg), **13** (28.6), and **14** (160.5 mg) were obtained from fraction Fr.4 (3.1 g) and Fr.5 (3.7 g), respectively, after MPLC over ODS (MeOH-H<sub>2</sub>O, 5:95→100:0), followed by CC over Sephadex LH-20 (CH<sub>2</sub>Cl<sub>2</sub>-MeOH, 1:1). Fraction Fr.6 (5.8 g) was subjected to MPLC over ODS (MeOH-H<sub>2</sub>O, 50:50→100:0). Further purification by CC over sephadex LH - 20 (CH<sub>2</sub>Cl<sub>2</sub>-MeOH, 1:1) and by preparative TLC (CH<sub>2</sub>Cl<sub>2</sub>-MeOH, 10:1) provided **21** (5.0 mg)

**Cytotoxic Bioassay.** The experiment was conducted using MTT method. Briefly, five human cancer cell lines of SHG-44, 7402, ECA-109, Hela-S3, and PANC-1 were seeded to 96-well plates to incubate for 24 h. Then the tested compounds and *cis*-DDP were added to each well, and the incubation was continued for 48 h. Subsequently, MTT was added and incubated for another 4 h. The liquid supernatant was removed softly and DMSO was added. The absorbencies were measured at 490 nm.

## Computational methods

**Conformational Analysis.** Conformational analysis was initially performed using RDKit Toolkit by Genetic algorithm (GA) at MMFF94 force field for the four configurations **a-d** of **1**. RMSD cutoff was set as 0.5 Å and energy window as 7 kcal/mol. Energies of dominating conformers (Boltzmann population > 1%) were provided in Table S1.

**NMR Calculation.** Conformers were delivered to geometry optimization and NMR calculation by Gaussian 09. First, all conformers were optimized at PM6 using semi-empirical theory method, and then optimized at B3LYP/6-311+G(d,p) in gas phase (Tables S2 and S3). Room-temperature equilibrium populations were calculated

according to the Boltzmann distribution law of  $\frac{N_i}{N} = \frac{g_i e^{-\frac{E_i}{k_B T}}}{\sum g_i e^{-\frac{E_i}{k_B T}}}$ , where  $N_i$  is the number of conformer  $i$  with energy  $E_i$  and degeneracy  $g_i$  at temperature  $T$ , and  $k_B$  is Boltzmann constant. The conformers with Boltzmann-based distribution higher than 5% were chosen for NMR calculations. The theoretical calculation of NMR was conducted using the Gauge-Including Atomic Orbitals (GIAO) method at mPW1PW91/6-311+G(2d,p) in methanol by the IEFPCM model. Finally, the TMS-corrected NMR chemical shift values were averaged according to Boltzmann distribution and fitted to the experimental values by linear regression. The calculated  $^{13}\text{C}$ - and  $^1\text{H}$ -NMR chemical shift values of TMS in Chloroform were 187.18 ppm and 31.73 ppm, respectively.

## Energies and coordinates

**Energies at MMFF94 Force Field.** Systematic conformational search was performed by RDKit Toolkit at MMFF94 force field. Conformers were filtered by RMSD threshold of 0.5 Å and energy window of 7 kcal/mol, and only those with Boltzmann-based population over 1% were selected for further calculations.

**Energies at B3LYP Theory Level.** Structures for NMR calculations were optimized at B3LYP/6-311+G(d,p) in gas phase and only conformers with high Boltzmann-based population (> 5%) were retained.

## Experimental and computed NMR chemical shifts

**$^{13}\text{C}$ - and  $^1\text{H}$ -NMR Chemical Shifts.** Computed  $^{13}\text{C}$ - and  $^1\text{H}$ -NMR chemical shifts of each conformer were first Boltzmann-weighted averaged, and then fitted to experimental values by Ordinary Least Squares (OLS) linear regression method in order to remove systematic error that results from the conformational search and random error from experimental conditions.

All computed  $^{13}\text{C}$ -NMR chemical shifts showed comparably high correlations to the experimental values (Table S4)

**Table S**, while configuration **c** had the highest  $R^2$  value and least CMAD and CLAD in  $^1\text{H}$ -NMR chemical shifts (Table 2).

**Table S1** Energies of compound **1** at MMFF94 force field.

| Configuration | conformer | Energy (kcal/mol) | Population (%) |
|---------------|-----------|-------------------|----------------|
| <b>a</b>      | 1         | 83.93             | 37.61          |
| <b>a</b>      | 2         | 84.45             | 15.47          |
| <b>a</b>      | 3         | 84.63             | 11.43          |
| <b>a</b>      | 4         | 84.74             | 9.52           |
| <b>a</b>      | 5         | 84.93             | 6.92           |
| <b>a</b>      | 6         | 85.40             | 3.14           |
| <b>a</b>      | 7         | 85.41             | 3.09           |
| <b>a</b>      | 8         | 85.62             | 2.15           |
| <b>a</b>      | 9         | 85.92             | 1.31           |
| <b>a</b>      | 10        | 85.95             | 1.23           |
| <b>a</b>      | 11        | 86.04             | 1.06           |
| <b>b</b>      | 1         | 83.37             | 36.85          |
| <b>b</b>      | 2         | 83.40             | 35.06          |
| <b>b</b>      | 3         | 84.13             | 10.25          |
| <b>b</b>      | 4         | 84.66             | 4.20           |
| <b>b</b>      | 5         | 84.71             | 3.87           |
| <b>b</b>      | 6         | 85.17             | 1.76           |
| <b>c</b>      | 1         | 81.47             | 19.64          |
| <b>c</b>      | 2         | 81.70             | 13.44          |
| <b>c</b>      | 3         | 82.18             | 5.91           |
| <b>c</b>      | 4         | 82.32             | 4.68           |
| <b>c</b>      | 5         | 82.45             | 3.76           |
| <b>c</b>      | 6         | 83.23             | 1.00           |
| <b>d</b>      | 1         | 87.49             | 28.91          |
| <b>d</b>      | 2         | 87.70             | 20.30          |
| <b>d</b>      | 3         | 87.74             | 18.96          |
| <b>d</b>      | 4         | 88.00             | 12.30          |
| <b>d</b>      | 5         | 88.14             | 9.61           |
| <b>d</b>      | 6         | 88.21             | 8.54           |

**Table S2** Energies of compound **1** at B3LYP/6-311+G(d,p) in gas phase.

| Configuration | Conformer | Structure                                                                           | E (Hartree)   | E (kcal/mol) | Population (%) |
|---------------|-----------|-------------------------------------------------------------------------------------|---------------|--------------|----------------|
| <b>a</b>      | 1         | 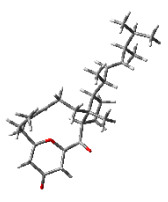   | -737.73298391 | -462934.43   | 21.61          |
| <b>a</b>      | 8         |    | -737.73368179 | -462934.87   | 45.28          |
| <b>b</b>      | 1         |    | -737.73338632 | -462934.69   | 33.11          |
| <b>b</b>      | 2         |   | -737.74023312 | -462938.98   | 47.02          |
| <b>c</b>      | 2         |  | -737.73954070 | -462938.55   | 21.78          |
| <b>d</b>      | 8         |  | -813.01797551 | -510176.48   | 86.21          |



**Table S3** Standard orientations of compound **1** at B3LYP/6-311+G(d,p) level in gas phase for NMR calculations.

Conformer **a-1**

| Center Number | Atomic Number | Atomic Type | Coordinates (Angstroms) |           |           |
|---------------|---------------|-------------|-------------------------|-----------|-----------|
|               |               |             | X                       | Y         | Z         |
| 1             | 6             | 0           | -4.287038               | 1.374928  | -2.095516 |
| 2             | 1             | 0           | -3.371416               | 1.400886  | -2.693838 |
| 3             | 1             | 0           | -5.109625               | 1.520789  | -2.804505 |
| 4             | 6             | 0           | -4.445072               | -0.041134 | -1.525426 |
| 5             | 1             | 0           | -4.341547               | -0.751779 | -2.361835 |
| 6             | 6             | 0           | -5.797210               | -0.316899 | -0.837413 |
| 7             | 1             | 0           | -6.625628               | -0.257404 | -1.545812 |
| 8             | 1             | 0           | -5.956327               | 0.426059  | -0.047699 |
| 9             | 6             | 0           | -5.794780               | -1.693084 | -0.191610 |
| 10            | 6             | 0           | -3.083886               | 2.802779  | -0.218416 |
| 11            | 6             | 0           | -4.301354               | 2.545144  | -1.096956 |
| 12            | 1             | 0           | -5.172636               | 2.443129  | -0.436662 |
| 13            | 1             | 0           | -4.504055               | 3.464113  | -1.664665 |
| 14            | 6             | 0           | -4.566889               | -2.000264 | 0.647778  |
| 15            | 1             | 0           | -4.626911               | -1.426097 | 1.579352  |
| 16            | 1             | 0           | -4.555236               | -3.058471 | 0.906522  |
| 17            | 6             | 0           | -3.286942               | -1.585914 | -0.093502 |
| 18            | 1             | 0           | -3.106075               | -2.292109 | -0.924845 |
| 19            | 6             | 0           | -2.028000               | -1.623795 | 0.805670  |
| 20            | 6             | 0           | -1.894082               | 2.224353  | -0.417600 |
| 21            | 1             | 0           | -1.806537               | 1.536687  | -1.249986 |
| 22            | 6             | 0           | -0.758688               | -1.023109 | 0.216955  |
| 23            | 1             | 0           | -1.058618               | -0.396472 | -0.622591 |
| 24            | 6             | 0           | 0.179220                | -0.151904 | 1.125551  |
| 25            | 6             | 0           | -0.469354               | 1.215652  | 1.499840  |
| 26            | 1             | 0           | 0.129240                | 1.642217  | 2.307903  |
| 27            | 1             | 0           | -1.445476               | 1.004266  | 1.950912  |
| 28            | 6             | 0           | -0.660187               | 2.341405  | 0.439126  |
| 29            | 1             | 0           | 0.221199                | 2.395979  | -0.206307 |
| 30            | 1             | 0           | -0.675947               | 3.286107  | 0.988189  |
| 31            | 6             | 0           | 0.154931                | -2.148795 | -0.336383 |
| 32            | 1             | 0           | 0.151423                | -3.004272 | 0.342711  |
| 33            | 1             | 0           | -0.196562               | -2.507060 | -1.307174 |
| 34            | 6             | 0           | 1.559814                | -1.508367 | -0.414374 |
| 35            | 1             | 0           | 1.931619                | -1.465263 | -1.439594 |
| 36            | 1             | 0           | 2.283133                | -2.105864 | 0.146570  |
| 37            | 6             | 0           | 1.450620                | -0.084666 | 0.197918  |
| 38            | 6             | 0           | -3.378768               | 3.773626  | 0.899874  |

|    |   |   |           |           |           |
|----|---|---|-----------|-----------|-----------|
| 39 | 1 | 0 | -2.489343 | 4.082171  | 1.448457  |
| 40 | 1 | 0 | -4.078184 | 3.333742  | 1.621554  |
| 41 | 1 | 0 | -3.862113 | 4.677102  | 0.509636  |
| 42 | 6 | 0 | 0.521981  | -0.862752 | 2.452364  |
| 43 | 1 | 0 | 1.263896  | -0.284866 | 3.009178  |
| 44 | 1 | 0 | 0.929022  | -1.863816 | 2.295151  |
| 45 | 1 | 0 | -0.362426 | -0.971889 | 3.079367  |
| 46 | 8 | 0 | -6.697979 | -2.486240 | -0.345072 |
| 47 | 8 | 0 | -2.078091 | -2.190094 | 1.875097  |
| 48 | 8 | 0 | -3.379688 | -0.269540 | -0.605576 |
| 49 | 6 | 0 | 2.811687  | 0.371635  | 0.794333  |
| 50 | 6 | 0 | 3.887295  | 0.301751  | -0.267297 |
| 51 | 1 | 0 | 3.718691  | 0.927098  | -1.146556 |
| 52 | 6 | 0 | 2.814640  | 1.792012  | 1.395315  |
| 53 | 1 | 0 | 3.823254  | 2.051162  | 1.726774  |
| 54 | 1 | 0 | 2.151407  | 1.881230  | 2.256391  |
| 55 | 1 | 0 | 2.509240  | 2.538347  | 0.655552  |
| 56 | 1 | 0 | 3.086676  | -0.332889 | 1.587506  |
| 57 | 1 | 0 | 1.212806  | 0.607061  | -0.619793 |
| 58 | 6 | 0 | 5.007847  | -0.417074 | -0.197024 |
| 59 | 6 | 0 | 6.084951  | -0.469205 | -1.252795 |
| 60 | 6 | 0 | 7.443768  | 0.134403  | -0.781058 |
| 61 | 6 | 0 | 8.031754  | -0.550639 | 0.462236  |
| 62 | 1 | 0 | 9.022918  | -0.145053 | 0.684948  |
| 63 | 1 | 0 | 8.143672  | -1.629454 | 0.327238  |
| 64 | 1 | 0 | 7.406165  | -0.383458 | 1.344180  |
| 65 | 6 | 0 | 7.340591  | 1.649821  | -0.563980 |
| 66 | 1 | 0 | 6.649917  | 1.887056  | 0.250384  |
| 67 | 1 | 0 | 6.979575  | 2.157409  | -1.463859 |
| 68 | 1 | 0 | 8.316557  | 2.074401  | -0.310374 |
| 69 | 1 | 0 | 8.145029  | -0.032058 | -1.609752 |
| 70 | 1 | 0 | 5.751753  | 0.151762  | -2.093984 |
| 71 | 6 | 0 | 6.250637  | -1.907477 | -1.780144 |
| 72 | 1 | 0 | 6.512028  | -2.605252 | -0.979424 |
| 73 | 1 | 0 | 7.038091  | -1.957767 | -2.538726 |
| 74 | 1 | 0 | 5.320838  | -2.261888 | -2.232292 |
| 75 | 1 | 0 | 5.167658  | -1.043191 | 0.681411  |

---

Conformer a-8

| Center<br>Number | Atomic<br>Number | Atomic<br>Type | Coordinates (Angstroms) |           |           |
|------------------|------------------|----------------|-------------------------|-----------|-----------|
|                  |                  |                | X                       | Y         | Z         |
| 1                | 6                | 0              | -4.823003               | 0.896441  | -1.687773 |
| 2                | 1                | 0              | -5.625997               | 0.995626  | -2.427756 |
| 3                | 1                | 0              | -5.290010               | 1.069213  | -0.713735 |
| 4                | 6                | 0              | -4.317016               | -0.550539 | -1.789115 |

---

|    |   |   |           |           |           |
|----|---|---|-----------|-----------|-----------|
| 5  | 1 | 0 | -3.965010 | -0.709297 | -2.814150 |
| 6  | 6 | 0 | -5.413029 | -1.580602 | -1.483370 |
| 7  | 1 | 0 | -5.045036 | -2.584546 | -1.732608 |
| 8  | 1 | 0 | -6.308022 | -1.406450 | -2.084336 |
| 9  | 6 | 0 | -5.786041 | -1.595951 | -0.010377 |
| 10 | 6 | 0 | -2.896996 | 2.416210  | -0.796394 |
| 11 | 6 | 0 | -3.755991 | 1.983499  | -1.970504 |
| 12 | 1 | 0 | -4.286980 | 2.870592  | -2.339296 |
| 13 | 1 | 0 | -3.112988 | 1.648689  | -2.789579 |
| 14 | 6 | 0 | -4.637045 | -1.291188 | 0.935705  |
| 15 | 1 | 0 | -4.755038 | -0.259271 | 1.286951  |
| 16 | 1 | 0 | -4.714058 | -1.923399 | 1.820553  |
| 17 | 6 | 0 | -3.274041 | -1.465040 | 0.261674  |
| 18 | 1 | 0 | -3.116050 | -2.540996 | 0.071418  |
| 19 | 6 | 0 | -2.115045 | -1.038275 | 1.196786  |
| 20 | 6 | 0 | -1.572998 | 2.216199  | -0.802431 |
| 21 | 1 | 0 | -1.159996 | 1.703402  | -1.668551 |
| 22 | 6 | 0 | -0.805036 | -0.668128 | 0.529885  |
| 23 | 1 | 0 | -1.078024 | -0.165903 | -0.396997 |
| 24 | 6 | 0 | 0.207967  | 0.253683  | 1.279113  |
| 25 | 6 | 0 | -0.383021 | 1.678644  | 1.468450  |
| 26 | 1 | 0 | 0.241978  | 2.215465  | 2.188583  |
| 27 | 1 | 0 | -1.352026 | 1.560534  | 1.966414  |
| 28 | 6 | 0 | -0.573002 | 2.624936  | 0.253675  |
| 29 | 1 | 0 | 0.393003  | 2.791043  | -0.230278 |
| 30 | 1 | 0 | -0.858996 | 3.597840  | 0.667905  |
| 31 | 6 | 0 | 0.009955  | -1.922038 | 0.123591  |
| 32 | 1 | 0 | 0.006942  | -2.663231 | 0.927414  |
| 33 | 1 | 0 | -0.411042 | -2.402822 | -0.762528 |
| 34 | 6 | 0 | 1.436962  | -1.373994 | -0.119267 |
| 35 | 1 | 0 | 1.738970  | -1.484747 | -1.162291 |
| 36 | 1 | 0 | 2.167952  | -1.933142 | 0.469605  |
| 37 | 6 | 0 | 1.437973  | 0.123905  | 0.304092  |
| 38 | 6 | 0 | -3.630998 | 3.120950  | 0.318769  |
| 39 | 1 | 0 | -2.958000 | 3.519762  | 1.077870  |
| 40 | 1 | 0 | -4.332009 | 2.451834  | 0.829603  |
| 41 | 1 | 0 | -4.227987 | 3.952050  | -0.076037 |
| 42 | 6 | 0 | 0.574951  | -0.285655 | 2.678987  |
| 43 | 1 | 0 | 1.363953  | 0.324230  | 3.126139  |
| 44 | 1 | 0 | 0.936941  | -1.316650 | 2.644743  |
| 45 | 1 | 0 | -0.288054 | -0.266806 | 3.341985  |
| 46 | 8 | 0 | -6.907046 | -1.830034 | 0.381558  |
| 47 | 8 | 0 | -2.298055 | -1.079560 | 2.394774  |
| 48 | 8 | 0 | -3.148025 | -0.758746 | -0.972156 |

---

|    |   |   |          |           |           |
|----|---|---|----------|-----------|-----------|
| 49 | 6 | 0 | 2.845974 | 0.566776  | 0.789209  |
| 50 | 6 | 0 | 3.874980 | 0.287023  | -0.283850 |
| 51 | 1 | 0 | 3.716992 | 0.806251  | -1.231727 |
| 52 | 6 | 0 | 2.950985 | 2.051678  | 1.191565  |
| 53 | 1 | 0 | 3.976985 | 2.285598  | 1.486629  |
| 54 | 1 | 0 | 2.298980 | 2.300484  | 2.029620  |
| 55 | 1 | 0 | 2.692998 | 2.708881  | 0.354721  |
| 56 | 1 | 0 | 3.107961 | -0.041436 | 1.663066  |
| 57 | 1 | 0 | 1.203986 | 0.722120  | -0.585767 |
| 58 | 6 | 0 | 4.943971 | -0.499019 | -0.154029 |
| 59 | 6 | 0 | 5.971977 | -0.767772 | -1.226086 |
| 60 | 6 | 0 | 7.392979 | -0.230870 | -0.872946 |
| 61 | 6 | 0 | 7.974963 | -0.811186 | 0.424920  |
| 62 | 1 | 0 | 9.005966 | -0.473229 | 0.562009  |
| 63 | 1 | 0 | 7.988953 | -1.904185 | 0.419659  |
| 64 | 1 | 0 | 7.406960 | -0.484390 | 1.299994  |
| 65 | 6 | 0 | 7.421994 | 1.303122  | -0.838578 |
| 66 | 1 | 0 | 6.789991 | 1.692935  | -0.035490 |
| 67 | 1 | 0 | 7.064005 | 1.730350  | -1.780479 |
| 68 | 1 | 0 | 8.439996 | 1.669072  | -0.671483 |
| 69 | 1 | 0 | 8.042983 | -0.552679 | -1.697018 |
| 70 | 1 | 0 | 5.656989 | -0.226553 | -2.126959 |
| 71 | 6 | 0 | 5.998965 | -2.268688 | -1.576445 |
| 72 | 1 | 0 | 6.231953 | -2.884899 | -0.704590 |
| 73 | 1 | 0 | 6.748970 | -2.477511 | -2.345489 |
| 74 | 1 | 0 | 5.025965 | -2.592588 | -1.955530 |
| 75 | 1 | 0 | 5.091959 | -1.019247 | 0.792847  |

---

**Conformer b-1**

---

| Center<br>Number | Atomic<br>Number | Atomic<br>Type | Coordinates (Angstroms) |           |           |
|------------------|------------------|----------------|-------------------------|-----------|-----------|
|                  |                  |                | X                       | Y         | Z         |
| 1                | 6                | 0              | -4.463555               | 1.454625  | -1.819385 |
| 2                | 1                | 0              | -3.640500               | 1.198486  | -2.493936 |
| 3                | 1                | 0              | -5.354831               | 1.543902  | -2.449181 |
| 4                | 6                | 0              | -4.675127               | 0.280108  | -0.857656 |
| 5                | 1                | 0              | -5.134240               | 0.653560  | 0.071387  |
| 6                | 6                | 0              | -5.569650               | -0.837579 | -1.428111 |
| 7                | 1                | 0              | -5.148021               | -1.161935 | -2.388158 |
| 8                | 1                | 0              | -6.590814               | -0.491188 | -1.598762 |
| 9                | 6                | 0              | -5.609405               | -2.037291 | -0.493483 |
| 10               | 6                | 0              | -3.016117               | 3.033817  | -0.268165 |
| 11               | 6                | 0              | -4.244462               | 2.819162  | -1.142708 |
| 12               | 1                | 0              | -5.131479               | 3.029495  | -0.529664 |
| 13               | 1                | 0              | -4.256441               | 3.596143  | -1.920014 |
| 14               | 6                | 0              | -4.265508               | -2.458723 | 0.081470  |

---

|    |   |   |           |           |           |
|----|---|---|-----------|-----------|-----------|
| 15 | 1 | 0 | -4.416691 | -3.146010 | 0.912689  |
| 16 | 1 | 0 | -3.713648 | -2.984271 | -0.707989 |
| 17 | 6 | 0 | -3.444020 | -1.222495 | 0.512620  |
| 18 | 1 | 0 | -3.920200 | -0.771003 | 1.397825  |
| 19 | 6 | 0 | -2.024137 | -1.621272 | 0.957505  |
| 20 | 6 | 0 | -1.910133 | 2.287180  | -0.377577 |
| 21 | 1 | 0 | -1.918321 | 1.497914  | -1.118324 |
| 22 | 6 | 0 | -0.805357 | -1.020737 | 0.268872  |
| 23 | 1 | 0 | -1.154706 | -0.395657 | -0.550202 |
| 24 | 6 | 0 | 0.153535  | -0.132647 | 1.153794  |
| 25 | 6 | 0 | -0.482398 | 1.243740  | 1.517987  |
| 26 | 1 | 0 | 0.119460  | 1.668065  | 2.324661  |
| 27 | 1 | 0 | -1.461672 | 1.050299  | 1.971543  |
| 28 | 6 | 0 | -0.655249 | 2.364847  | 0.449831  |
| 29 | 1 | 0 | 0.211055  | 2.373775  | -0.218417 |
| 30 | 1 | 0 | -0.618576 | 3.316300  | 0.984606  |
| 31 | 6 | 0 | 0.102455  | -2.133899 | -0.308604 |
| 32 | 1 | 0 | 0.088445  | -3.002645 | 0.351579  |
| 33 | 1 | 0 | -0.259317 | -2.464549 | -1.285495 |
| 34 | 6 | 0 | 1.514360  | -1.511550 | -0.381727 |
| 35 | 1 | 0 | 1.899108  | -1.483832 | -1.402576 |
| 36 | 1 | 0 | 2.226231  | -2.108673 | 0.194619  |
| 37 | 6 | 0 | 1.414175  | -0.081741 | 0.212071  |
| 38 | 6 | 0 | -3.184010 | 4.182213  | 0.698318  |
| 39 | 1 | 0 | -2.274232 | 4.423726  | 1.246837  |
| 40 | 1 | 0 | -3.968463 | 3.961488  | 1.432298  |
| 41 | 1 | 0 | -3.503330 | 5.086618  | 0.166661  |
| 42 | 6 | 0 | 0.503050  | -0.831534 | 2.483665  |
| 43 | 1 | 0 | -0.375915 | -0.930575 | 3.122484  |
| 44 | 1 | 0 | 1.248395  | -0.249720 | 3.031506  |
| 45 | 1 | 0 | 0.903048  | -1.835789 | 2.334233  |
| 46 | 8 | 0 | -6.639552 | -2.612915 | -0.220497 |
| 47 | 8 | 0 | -1.934962 | -2.449651 | 1.839913  |
| 48 | 8 | 0 | -3.396064 | -0.273930 | -0.534353 |
| 49 | 6 | 0 | 2.782146  | 0.379364  | 0.790328  |
| 50 | 6 | 0 | 2.796319  | 1.804914  | 1.378936  |
| 51 | 1 | 0 | 2.143174  | 1.904229  | 2.246780  |
| 52 | 1 | 0 | 2.486062  | 2.546246  | 0.636220  |
| 53 | 1 | 0 | 3.809432  | 2.062985  | 1.697271  |
| 54 | 1 | 0 | 3.063833  | -0.319110 | 1.586527  |
| 55 | 6 | 0 | 3.845684  | 0.296768  | -0.282547 |
| 56 | 1 | 0 | 3.670931  | 0.917846  | -1.163614 |
| 57 | 1 | 0 | 1.168311  | 0.598799  | -0.612450 |
| 58 | 6 | 0 | 4.961585  | -0.429978 | -0.221088 |

---

|    |   |   |          |           |           |
|----|---|---|----------|-----------|-----------|
| 59 | 6 | 0 | 6.024938 | -0.497847 | -1.289801 |
| 60 | 6 | 0 | 7.397487 | 0.088320  | -0.836100 |
| 61 | 6 | 0 | 7.992534 | -0.603538 | 0.399967  |
| 62 | 1 | 0 | 8.992026 | -0.211363 | 0.609111  |
| 63 | 1 | 0 | 8.087899 | -1.683887 | 0.264594  |
| 64 | 1 | 0 | 7.381066 | -0.427109 | 1.289958  |
| 65 | 6 | 0 | 7.316564 | 1.605073  | -0.619134 |
| 66 | 1 | 0 | 6.639294 | 1.851448  | 0.203729  |
| 67 | 1 | 0 | 6.950465 | 2.116442  | -1.514818 |
| 68 | 1 | 0 | 8.300958 | 2.017531  | -0.378417 |
| 69 | 1 | 0 | 8.085755 | -0.087879 | -1.673612 |
| 70 | 1 | 0 | 5.689505 | 0.125969  | -2.127985 |
| 71 | 6 | 0 | 6.164636 | -1.939188 | -1.816556 |
| 72 | 1 | 0 | 6.425165 | -2.639363 | -1.017687 |
| 73 | 1 | 0 | 6.942814 | -2.001433 | -2.583792 |
| 74 | 1 | 0 | 5.224975 | -2.281303 | -2.257605 |
| 75 | 1 | 0 | 5.126557 | -1.052676 | 0.658764  |

---

Conformer **b-2**

| Center<br>Number | Atomic<br>Number | Atomic<br>Type | Coordinates (Angstroms) |           |           |
|------------------|------------------|----------------|-------------------------|-----------|-----------|
|                  |                  |                | X                       | Y         | Z         |
| 1                | 6                | 0              | 5.014636                | 1.559220  | 0.517894  |
| 2                | 1                | 0              | 4.617129                | 1.509168  | 1.535551  |
| 3                | 1                | 0              | 6.103216                | 1.607208  | 0.620251  |
| 4                | 6                | 0              | 4.628748                | 0.256808  | -0.202843 |
| 5                | 1                | 0              | 4.273903                | 0.500383  | -1.215627 |
| 6                | 6                | 0              | 5.768945                | -0.769435 | -0.320012 |
| 7                | 1                | 0              | 6.143240                | -0.991147 | 0.687370  |
| 8                | 1                | 0              | 6.596491                | -0.386097 | -0.920490 |
| 9                | 6                | 0              | 5.264804                | -2.061938 | -0.945437 |
| 10               | 6                | 0              | 3.067081                | 2.998961  | -0.490782 |
| 11               | 6                | 0              | 4.553786                | 2.836676  | -0.205606 |
| 12               | 1                | 0              | 5.083166                | 2.887256  | -1.166807 |
| 13               | 1                | 0              | 4.910611                | 3.711217  | 0.355553  |
| 14               | 6                | 0              | 3.935770                | -2.568876 | -0.408654 |
| 15               | 1                | 0              | 3.540458                | -3.334086 | -1.075028 |
| 16               | 1                | 0              | 4.118135                | -3.035523 | 0.566595  |
| 17               | 6                | 0              | 2.938761                | -1.413597 | -0.210662 |
| 18               | 1                | 0              | 2.617614                | -1.042544 | -1.201038 |
| 19               | 6                | 0              | 1.651879                | -1.858174 | 0.511412  |
| 20               | 6                | 0              | 2.132581                | 2.347556  | 0.213877  |
| 21               | 1                | 0              | 2.478568                | 1.701950  | 1.010359  |
| 22               | 6                | 0              | 0.795145                | -0.808368 | 1.212254  |
| 23               | 1                | 0              | 1.455414                | -0.000087 | 1.518395  |
| 24               | 6                | 0              | -0.351673               | -0.171983 | 0.313904  |

---

|    |   |   |           |           |           |
|----|---|---|-----------|-----------|-----------|
| 25 | 6 | 0 | 0.097938  | 0.998688  | -0.605059 |
| 26 | 1 | 0 | -0.779042 | 1.255259  | -1.209490 |
| 27 | 1 | 0 | 0.832879  | 0.620995  | -1.324752 |
| 28 | 6 | 0 | 0.643788  | 2.329223  | -0.005280 |
| 29 | 1 | 0 | 0.137309  | 2.549158  | 0.940409  |
| 30 | 1 | 0 | 0.352663  | 3.132620  | -0.685264 |
| 31 | 6 | 0 | 0.075587  | -1.395933 | 2.462067  |
| 32 | 1 | 0 | 0.118027  | -2.484818 | 2.453167  |
| 33 | 1 | 0 | 0.584692  | -1.056712 | 3.367551  |
| 34 | 6 | 0 | -1.381372 | -0.887216 | 2.418365  |
| 35 | 1 | 0 | -1.743797 | -0.592627 | 3.406255  |
| 36 | 1 | 0 | -2.045682 | -1.675149 | 2.056803  |
| 37 | 6 | 0 | -1.343236 | 0.292355  | 1.435142  |
| 38 | 6 | 0 | 2.779873  | 3.953908  | -1.624035 |
| 39 | 1 | 0 | 1.718425  | 4.161868  | -1.754749 |
| 40 | 1 | 0 | 3.165329  | 3.561306  | -2.572690 |
| 41 | 1 | 0 | 3.288845  | 4.910221  | -1.455005 |
| 42 | 6 | 0 | -0.971475 | -1.243226 | -0.606708 |
| 43 | 1 | 0 | -1.852114 | -0.852010 | -1.115375 |
| 44 | 1 | 0 | -1.267230 | -2.142820 | -0.064889 |
| 45 | 1 | 0 | -0.255821 | -1.554373 | -1.373210 |
| 46 | 8 | 0 | 5.876332  | -2.641337 | -1.816387 |
| 47 | 8 | 0 | 1.345368  | -3.030674 | 0.477421  |
| 48 | 8 | 0 | 3.537192  | -0.347559 | 0.507516  |
| 49 | 6 | 0 | -2.708981 | 0.911223  | 1.019795  |
| 50 | 6 | 0 | -3.232101 | 1.817516  | 2.159265  |
| 51 | 1 | 0 | -4.151286 | 2.324860  | 1.857593  |
| 52 | 1 | 0 | -2.493111 | 2.579015  | 2.426947  |
| 53 | 1 | 0 | -3.454904 | 1.235550  | 3.058547  |
| 54 | 1 | 0 | -2.531774 | 1.558579  | 0.153074  |
| 55 | 6 | 0 | -3.794808 | -0.068994 | 0.641294  |
| 56 | 1 | 0 | -4.035717 | -0.829389 | 1.383586  |
| 57 | 1 | 0 | -0.816312 | 1.097554  | 1.961688  |
| 58 | 6 | 0 | -4.518278 | -0.024034 | -0.478065 |
| 59 | 6 | 0 | -5.635943 | -0.971686 | -0.838834 |
| 60 | 6 | 0 | -7.032172 | -0.281677 | -0.922532 |
| 61 | 6 | 0 | -7.100650 | 0.864701  | -1.943382 |
| 62 | 1 | 0 | -8.126046 | 1.236265  | -2.027538 |
| 63 | 1 | 0 | -6.784645 | 0.550291  | -2.941347 |
| 64 | 1 | 0 | -6.473645 | 1.708575  | -1.639975 |
| 65 | 6 | 0 | -7.509006 | 0.193994  | 0.455987  |
| 66 | 1 | 0 | -6.856699 | 0.977611  | 0.852298  |
| 67 | 1 | 0 | -7.518652 | -0.627378 | 1.179118  |
| 68 | 1 | 0 | -8.523585 | 0.599595  | 0.398806  |

---

|    |   |   |           |           |           |
|----|---|---|-----------|-----------|-----------|
| 69 | 1 | 0 | -7.727398 | -1.062248 | -1.259493 |
| 70 | 1 | 0 | -5.710703 | -1.713621 | -0.033867 |
| 71 | 6 | 0 | -5.295855 | -1.733340 | -2.134588 |
| 72 | 1 | 0 | -5.133066 | -1.052241 | -2.974999 |
| 73 | 1 | 0 | -6.105022 | -2.417000 | -2.409820 |
| 74 | 1 | 0 | -4.383918 | -2.322208 | -2.008232 |
| 75 | 1 | 0 | -4.279692 | 0.738027  | -1.221298 |

---

Conformer c-2

---

| Center<br>Number | Atomic<br>Number | Atomic<br>Type | Coordinates (Angstroms) |           |           |
|------------------|------------------|----------------|-------------------------|-----------|-----------|
|                  |                  |                | X                       | Y         | Z         |
| 1                | 6                | 0              | 5.127001                | 1.412097  | -0.067004 |
| 2                | 1                | 0              | 6.161997                | 1.749111  | 0.052996  |
| 3                | 1                | 0              | 5.057006                | 1.071096  | -1.105004 |
| 4                | 6                | 0              | 4.966018                | 0.230095  | 0.903996  |
| 5                | 1                | 0              | 5.129013                | 0.601097  | 1.919996  |
| 6                | 6                | 0              | 5.990034                | -0.887891 | 0.606996  |
| 7                | 1                | 0              | 5.975043                | -1.597891 | 1.441996  |
| 8                | 1                | 0              | 7.002028                | -0.493877 | 0.502996  |
| 9                | 6                | 0              | 5.600044                | -1.632896 | -0.655004 |
| 10               | 6                | 0              | 2.865985                | 2.569065  | -0.577004 |
| 11               | 6                | 0              | 4.180985                | 2.612084  | 0.176996  |
| 12               | 1                | 0              | 4.715972                | 3.523091  | -0.122004 |
| 13               | 1                | 0              | 3.986983                | 2.706081  | 1.249996  |
| 14               | 6                | 0              | 4.159050                | -2.097917 | -0.676004 |
| 15               | 1                | 0              | 4.067062                | -2.948918 | 0.008996  |
| 16               | 1                | 0              | 3.899055                | -2.450920 | -1.674004 |
| 17               | 6                | 0              | 3.192035                | -0.994930 | -0.209004 |
| 18               | 1                | 0              | 3.057025                | -0.257932 | -1.016004 |
| 19               | 6                | 0              | 1.790043                | -1.568950 | 0.099996  |
| 20               | 6                | 0              | 1.707988                | 2.409049  | 0.075996  |
| 21               | 1                | 0              | 1.764989                | 2.317050  | 1.157996  |
| 22               | 6                | 0              | 0.804031                | -0.692963 | 0.854996  |
| 23               | 1                | 0              | 1.347019                | 0.183044  | 1.202996  |
| 24               | 6                | 0              | -0.453976               | -0.185981 | 0.047996  |
| 25               | 6                | 0              | -0.145992               | 0.926023  | -0.988004 |
| 26               | 1                | 0              | -1.061994               | 1.080011  | -1.569004 |
| 27               | 1                | 0              | 0.586014                | 0.536034  | -1.706004 |
| 28               | 6                | 0              | 0.324989                | 2.328030  | -0.521004 |
| 29               | 1                | 0              | -0.394017               | 2.737020  | 0.193996  |
| 30               | 1                | 0              | 0.265980                | 2.982029  | -1.397004 |
| 31               | 6                | 0              | 0.203041                | -1.428972 | 2.083996  |
| 32               | 1                | 0              | 0.848039                | -1.300963 | 2.955996  |
| 33               | 1                | 0              | 0.138056                | -2.498973 | 1.882996  |
| 34               | 6                | 0              | -1.205967               | -0.814991 | 2.300996  |

---



|    |   |   |           |           |           |
|----|---|---|-----------|-----------|-----------|
| 35 | 1 | 0 | -1.974957 | -1.576002 | 2.151996  |
| 36 | 1 | 0 | -1.331973 | -0.432993 | 3.315996  |
| 37 | 6 | 0 | -1.320983 | 0.312007  | 1.251996  |
| 38 | 6 | 0 | 2.973983  | 2.750067  | -2.072004 |
| 39 | 1 | 0 | 2.004983  | 2.749053  | -2.571004 |
| 40 | 1 | 0 | 3.579994  | 1.964075  | -2.535004 |
| 41 | 1 | 0 | 3.472970  | 3.699074  | -2.305004 |
| 42 | 6 | 0 | -1.121960 | -1.342990 | -0.721004 |
| 43 | 1 | 0 | -2.056965 | -1.010003 | -1.172004 |
| 44 | 1 | 0 | -1.342948 | -2.197993 | -0.081004 |
| 45 | 1 | 0 | -0.469955 | -1.704981 | -1.519004 |
| 46 | 8 | 0 | 6.372047  | -1.835886 | -1.568004 |
| 47 | 8 | 0 | 1.521059  | -2.694953 | -0.260004 |
| 48 | 8 | 0 | 3.646026  | -0.332924 | 0.968996  |
| 49 | 6 | 0 | -2.741991 | 0.880987  | 0.981996  |
| 50 | 6 | 0 | -3.212003 | 1.698981  | 2.207996  |
| 51 | 1 | 0 | -4.156010 | 2.205967  | 1.991996  |
| 52 | 1 | 0 | -2.472013 | 2.455991  | 2.483996  |
| 53 | 1 | 0 | -3.373994 | 1.055978  | 3.077996  |
| 54 | 1 | 0 | -2.658001 | 1.582988  | 0.143996  |
| 55 | 6 | 0 | -3.813977 | -0.121028 | 0.622996  |
| 56 | 1 | 0 | -3.939965 | -0.963030 | 1.301996  |
| 57 | 1 | 0 | -0.761995 | 1.160015  | 1.667996  |
| 58 | 6 | 0 | -4.654979 | -0.006040 | -0.407004 |
| 59 | 6 | 0 | -5.762965 | -0.971055 | -0.748004 |
| 60 | 6 | 0 | -7.189974 | -0.362075 | -0.587004 |
| 61 | 6 | 0 | -7.428991 | 0.896922  | -1.434004 |
| 62 | 1 | 0 | -8.472996 | 1.214907  | -1.356004 |
| 63 | 1 | 0 | -7.216989 | 0.729925  | -2.494004 |
| 64 | 1 | 0 | -6.809003 | 1.730930  | -1.093004 |
| 65 | 6 | 0 | -7.523978 | -0.092080 | 0.885996  |
| 66 | 1 | 0 | -6.865988 | 0.673930  | 1.307996  |
| 67 | 1 | 0 | -7.411965 | -0.996078 | 1.491996  |
| 68 | 1 | 0 | -8.554982 | 0.256906  | 0.993996  |
| 69 | 1 | 0 | -7.882963 | -1.135085 | -0.944004 |
| 70 | 1 | 0 | -5.704954 | -1.804054 | -0.036004 |
| 71 | 6 | 0 | -5.548957 | -1.557052 | -2.157004 |
| 72 | 1 | 0 | -5.528968 | -0.776052 | -2.923004 |
| 73 | 1 | 0 | -6.349947 | -2.258063 | -2.415004 |
| 74 | 1 | 0 | -4.598950 | -2.095039 | -2.212004 |
| 75 | 1 | 0 | -4.530991 | 0.837962  | -1.087004 |

---

Conformer **d-8**

| Center<br>Number | Atomic<br>Number | Atomic<br>Type | Coordinates (Angstroms) |   |   |
|------------------|------------------|----------------|-------------------------|---|---|
|                  |                  |                | X                       | Y | Z |

---

---

|    |   |   |           |           |           |
|----|---|---|-----------|-----------|-----------|
| 1  | 6 | 0 | -5.263936 | 0.174335  | -0.712137 |
| 2  | 1 | 0 | -4.921323 | 0.530277  | -1.686063 |
| 3  | 1 | 0 | -6.216854 | -0.333651 | -0.892244 |
| 4  | 6 | 0 | -4.230800 | -0.828982 | -0.188457 |
| 5  | 1 | 0 | -3.498104 | -0.283956 | 0.420719  |
| 6  | 6 | 0 | -4.833189 | -1.955148 | 0.663556  |
| 7  | 1 | 0 | -5.575594 | -2.489459 | 0.056749  |
| 8  | 1 | 0 | -5.331193 | -1.568921 | 1.555323  |
| 9  | 6 | 0 | -3.766210 | -2.951070 | 1.083514  |
| 10 | 6 | 0 | -4.267562 | 2.229648  | 0.522950  |
| 11 | 6 | 0 | -5.484587 | 1.353815  | 0.247055  |
| 12 | 1 | 0 | -5.848595 | 0.969169  | 1.208501  |
| 13 | 1 | 0 | -6.303240 | 1.977969  | -0.133750 |
| 14 | 6 | 0 | -2.789230 | -3.340318 | -0.015393 |
| 15 | 1 | 0 | -1.903347 | -3.785953 | 0.434179  |
| 16 | 1 | 0 | -3.293595 | -4.103768 | -0.619997 |
| 17 | 6 | 0 | -2.411775 | -2.172128 | -0.946971 |
| 18 | 1 | 0 | -2.046682 | -2.587359 | -1.892727 |
| 19 | 6 | 0 | -1.216916 | -1.322408 | -0.404943 |
| 20 | 6 | 0 | -3.270890 | 2.365213  | -0.361488 |
| 21 | 1 | 0 | -3.373593 | 1.861852  | -1.319494 |
| 22 | 6 | 0 | -0.927447 | -0.016964 | -1.139079 |
| 23 | 1 | 0 | -1.867715 | 0.334105  | -1.557917 |
| 24 | 6 | 0 | -0.186469 | 1.151448  | -0.359004 |
| 25 | 6 | 0 | -0.734883 | 2.530642  | -0.857059 |
| 26 | 1 | 0 | -0.886151 | 2.470081  | -1.942526 |
| 27 | 1 | 0 | 0.063523  | 3.265699  | -0.717583 |
| 28 | 6 | 0 | -1.994402 | 3.148539  | -0.207207 |
| 29 | 1 | 0 | -2.122346 | 4.133896  | -0.678097 |
| 30 | 1 | 0 | -1.794154 | 3.352277  | 0.846564  |
| 31 | 6 | 0 | 0.055109  | -0.399432 | -2.286181 |
| 32 | 1 | 0 | -0.140556 | -1.384736 | -2.717656 |
| 33 | 1 | 0 | -0.045358 | 0.329052  | -3.097603 |
| 34 | 6 | 0 | 1.424363  | -0.280342 | -1.625408 |
| 35 | 1 | 0 | 2.242427  | -0.286134 | -2.348893 |
| 36 | 1 | 0 | 1.589657  | -1.114723 | -0.937610 |
| 37 | 6 | 0 | 1.332138  | 1.046285  | -0.853615 |
| 38 | 6 | 0 | -4.305227 | 2.913509  | 1.867129  |
| 39 | 1 | 0 | -3.483962 | 3.612982  | 2.018656  |
| 40 | 1 | 0 | -4.285143 | 2.179334  | 2.681639  |
| 41 | 1 | 0 | -5.241326 | 3.473406  | 1.978618  |
| 42 | 6 | 0 | -0.358078 | 1.038979  | 1.166532  |
| 43 | 1 | 0 | 0.043461  | 1.917075  | 1.676200  |
| 44 | 1 | 0 | 0.131040  | 0.154458  | 1.567738  |

---

|    |   |   |           |           |           |
|----|---|---|-----------|-----------|-----------|
| 45 | 1 | 0 | -1.416667 | 0.971896  | 1.430824  |
| 46 | 8 | 0 | -3.716063 | -3.424146 | 2.196567  |
| 47 | 8 | 0 | -0.490395 | -1.801649 | 0.439390  |
| 48 | 8 | 0 | -3.541891 | -1.390762 | -1.316656 |
| 49 | 6 | 0 | 2.455942  | 1.248219  | 0.198986  |
| 50 | 6 | 0 | 3.797653  | 0.808035  | -0.340068 |
| 51 | 1 | 0 | 4.138160  | 1.322438  | -1.241189 |
| 52 | 6 | 0 | 2.576114  | 2.718165  | 0.655729  |
| 53 | 1 | 0 | 3.345599  | 2.816859  | 1.425543  |
| 54 | 1 | 0 | 1.642128  | 3.108815  | 1.063254  |
| 55 | 1 | 0 | 2.864901  | 3.358596  | -0.184883 |
| 56 | 1 | 0 | 2.235459  | 0.625853  | 1.071703  |
| 57 | 1 | 0 | 1.464571  | 1.842190  | -1.599511 |
| 58 | 6 | 0 | 4.590313  | -0.110317 | 0.212692  |
| 59 | 6 | 0 | 5.948271  | -0.517306 | -0.305337 |
| 60 | 6 | 0 | 7.096965  | -0.001760 | 0.617510  |
| 61 | 6 | 0 | 8.475164  | -0.159151 | -0.042010 |
| 62 | 1 | 0 | 8.762464  | -1.210491 | -0.137827 |
| 63 | 1 | 0 | 9.246537  | 0.334689  | 0.556545  |
| 64 | 1 | 0 | 8.493193  | 0.286463  | -1.041503 |
| 65 | 6 | 0 | 7.095885  | -0.625949 | 2.021207  |
| 66 | 1 | 0 | 7.302010  | -1.699854 | 1.985069  |
| 67 | 1 | 0 | 6.141218  | -0.483249 | 2.533833  |
| 68 | 1 | 0 | 7.871809  | -0.166906 | 2.640992  |
| 69 | 1 | 0 | 6.915054  | 1.073537  | 0.737156  |
| 70 | 1 | 0 | 6.090830  | -0.016376 | -1.271511 |
| 71 | 6 | 0 | 5.990005  | -2.037160 | -0.556198 |
| 72 | 1 | 0 | 5.797147  | -2.601885 | 0.360447  |
| 73 | 1 | 0 | 6.957324  | -2.357626 | -0.951294 |
| 74 | 1 | 0 | 5.223545  | -2.321459 | -1.281566 |
| 75 | 1 | 0 | 4.242305  | -0.624392 | 1.108946  |

---

**Table S4** Statistics of Ordinary Least Squares (OLS) linear regression of experimental and computed  $^{13}\text{C}$ -NMR chemical shifts.

| Configuration | Conformer | CMAD <sup>a</sup> | CLAD <sup>b</sup> | $R^2$  | RMSE | $F$     | $p$ value |
|---------------|-----------|-------------------|-------------------|--------|------|---------|-----------|
| a             | 1         | 3.0               | 7.1               | 0.9959 | 3.7  | 6308.18 | < 0.01    |
|               | 8         | 3.1               | 7.1               | 0.9958 | 3.7  | 6204.82 | < 0.01    |
|               | Boltzmann | 3.0               | 7.1               | 0.9960 | 3.7  | 6444.17 | < 0.01    |
| b             | 1         | 3.0               | 8.6               | 0.9952 | 4.0  | 5365.31 | < 0.01    |
|               | 2         | 2.4               | 7.8               | 0.9963 | 3.5  | 6967.25 | < 0.01    |
|               | Boltzmann | 2.4               | 7.9               | 0.9963 | 3.5  | 6986.99 | < 0.01    |
| c             | 2         | 2.7               | 7.2               | 0.9960 | 3.7  | 6420.17 | < 0.01    |
| d             | 8         | 3.8               | 9.0               | 0.9933 | 4.7  | 3855.39 | < 0.01    |

<sup>a</sup> CMAD (corrected mean absolute deviation) =  $(1/n)\sum_i^p |\delta_{\text{calc}} - \delta_{\text{exp}}|$ , <sup>b</sup> CLAD (corrected largest absolute deviation) =  $\max(|\delta_{\text{calc}} - \delta_{\text{exp}}|)$ , where  $\delta_{\text{calc}}$  and  $\delta_{\text{exp}}$  refer to the calculated and experimental chemical shifts.

**Table S5** Experimental and computed  $^{13}\text{C}$  NMR chemical shifts.

| Position | Experimental | Calculated |          |          |          |
|----------|--------------|------------|----------|----------|----------|
|          |              | <b>a</b>   | <b>b</b> | <b>c</b> | <b>d</b> |
| 1        | 35.5         | 30.3       | 35.5     | 37.9     | 30.7     |
| 2        | 31.2         | 27.4       | 30.1     | 26.5     | 31.9     |
| 3        | 75.1         | 77.2       | 78.5     | 79.0     | 71.9     |
| 4        | 43.0         | 44.0       | 47.4     | 46.6     | 46.4     |
| 5        | 215.2        | 209.5      | 207.6    | 208.2    | 206.2    |
| 6        | 44.7         | 41.4       | 42.3     | 42.5     | 37.2     |
| 7        | 77.3         | 79.5       | 80.7     | 76.5     | 77.9     |
| 8        | 210.7        | 213.0      | 214.5    | 212.9    | 215.9    |
| 9        | 128.8        | 126.9      | 128.7    | 127.3    | 124.2    |
| 10       | 133.0        | 134.5      | 132.4    | 137.8    | 135.2    |
| 11       | 21.7         | 22.9       | 21.7     | 23.1     | 25.2     |
| 12       | 37.5         | 39.7       | 38.5     | 37.6     | 43.0     |
| 13       | 45.5         | 51.6       | 52.5     | 52.7     | 47.8     |
| 14       | 59.6         | 53.9       | 51.7     | 52.9     | 55.4     |
| 15       | 23.6         | 28.6       | 25.4     | 27.1     | 30.4     |
| 16       | 26.0         | 29.8       | 25.0     | 20.4     | 30.1     |
| 17       | 49.0         | 47.1       | 49.1     | 51.5     | 57.4     |
| 18       | 16.7         | 15.7       | 16.9     | 17.2     | 13.3     |
| 19       | 14.7         | 15.5       | 15.3     | 13.2     | 17.1     |
| 20       | 37.4         | 42.4       | 39.1     | 37.5     | 39.3     |
| 21       | 21.5         | 18.0       | 19.8     | 22.8     | 20.0     |
| 22       | 134.8        | 139.4      | 137.9    | 136.0    | 135.6    |
| 23       | 132.6        | 129.8      | 130.8    | 131.4    | 135.0    |
| 24       | 42.9         | 44.4       | 43.8     | 44.4     | 43.9     |
| 25       | 33.1         | 35.1       | 34.6     | 35.1     | 35.8     |
| 26       | 19.7         | 12.6       | 12.0     | 12.9     | 12.2     |
| 27       | 20.0         | 19.8       | 19.1     | 19.9     | 19.3     |
| 28       | 17.5         | 18.6       | 17.5     | 17.8     | 10.3     |

**Table S6** Experimental and computed  $^1\text{H}$  NMR chemical shifts.

| Position | Experimental | Calculated |          |          |          |
|----------|--------------|------------|----------|----------|----------|
|          |              | <b>a</b>   | <b>b</b> | <b>c</b> | <b>d</b> |
| 1a       | 2.34         | 2.18       | 2.38     | 2.28     | 2.26     |
| 1b       | 2.04         | 2.18       | 2.01     | 2.20     | 1.73     |
| 2a       | 1.79         | 2.56       | 2.23     | 1.80     | 2.25     |
| 2b       | 1.59         | 1.47       | 1.60     | 1.36     | 1.69     |
| 3        | 4.11         | 3.80       | 3.11     | 4.13     | 3.25     |
| 4a       | 2.56         | 2.48       | 2.30     | 2.65     | 2.23     |
| 4b       | 2.27         | 1.96       | 2.14     | 2.02     | 2.20     |
| 6a       | 2.97         | 2.23       | 2.46     | 2.35     | 2.93     |
| 6b       | 2.65         | 2.20       | 2.08     | 2.23     | 2.28     |
| 7        | 4.07         | 3.75       | 3.48     | 3.75     | 4.41     |
| 9        | 5.50         | 5.63       | 5.84     | 5.48     | 5.21     |
| 11a      | 2.19         | 2.32       | 2.37     | 2.26     | 2.56     |
| 11b      | 1.95         | 2.16       | 2.15     | 1.94     | 2.08     |
| 12a      | 1.87         | 1.77       | 1.88     | 1.60     | 1.87     |
| 12b      | 1.82         | 1.29       | 1.25     | 1.35     | 1.66     |
| 14       | 2.83         | 3.79       | 3.95     | 3.65     | 3.76     |
| 15a      | 2.00         | 1.82       | 1.93     | 1.77     | 1.91     |
| 15b      | 1.61         | 1.52       | 1.68     | 1.77     | 1.48     |
| 16a      | 1.77         | 1.77       | 1.77     | 1.82     | 1.40     |
| 16b      | 1.41         | 1.46       | 1.66     | 1.73     | 1.37     |
| 17       | 1.70         | 2.00       | 2.10     | 2.02     | 1.39     |
| 18       | 0.89         | 1.14       | 0.83     | 0.84     | 1.09     |
| 19       | 1.58         | 1.64       | 1.70     | 1.69     | 1.68     |
| 20       | 2.11         | 2.06       | 2.19     | 2.33     | 2.20     |
| 21       | 1.02         | 1.12       | 1.15     | 1.14     | 1.10     |
| 22       | 5.22         | 5.06       | 5.09     | 5.25     | 4.98     |
| 23       | 5.20         | 5.01       | 4.94     | 4.95     | 5.28     |
| 24       | 1.86         | 2.02       | 2.05     | 2.05     | 2.05     |
| 25       | 1.46         | 1.64       | 1.63     | 1.61     | 1.71     |
| 26       | 0.82         | 0.90       | 0.93     | 0.90     | 0.96     |
| 27       | 0.84         | 0.96       | 0.98     | 0.95     | 1.06     |
| 28       | 0.92         | 1.08       | 1.09     | 1.08     | 0.94     |

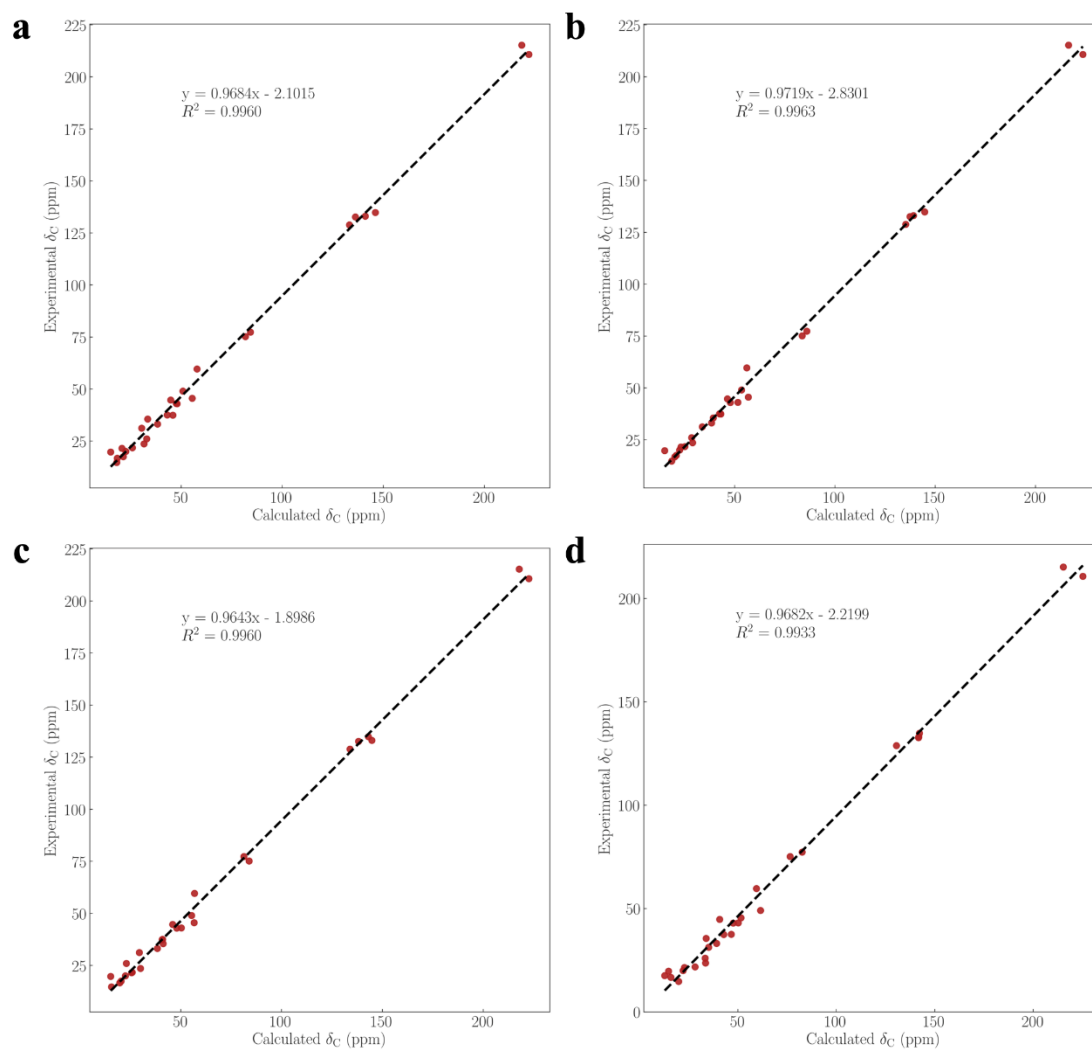

**Figure S1** Linear regression fitting of computed  $^{13}\text{C}$  NMR chemical shifts of the four configurations **a–d** to experimental values.

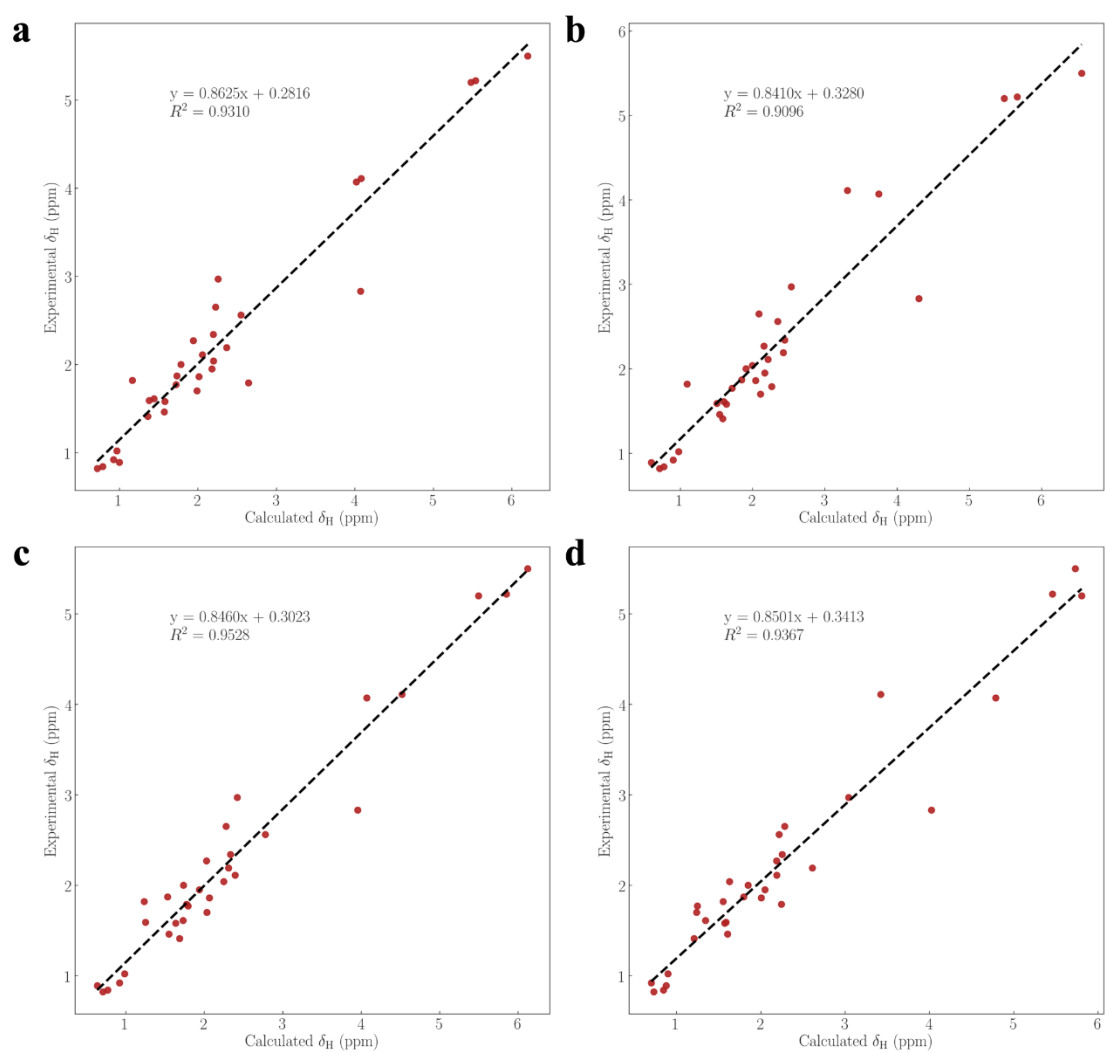

**Figure S2** Linear regression fitting of computed  $^1\text{H}$  NMR chemical shifts of the four configurations **a–d** to experimental values.



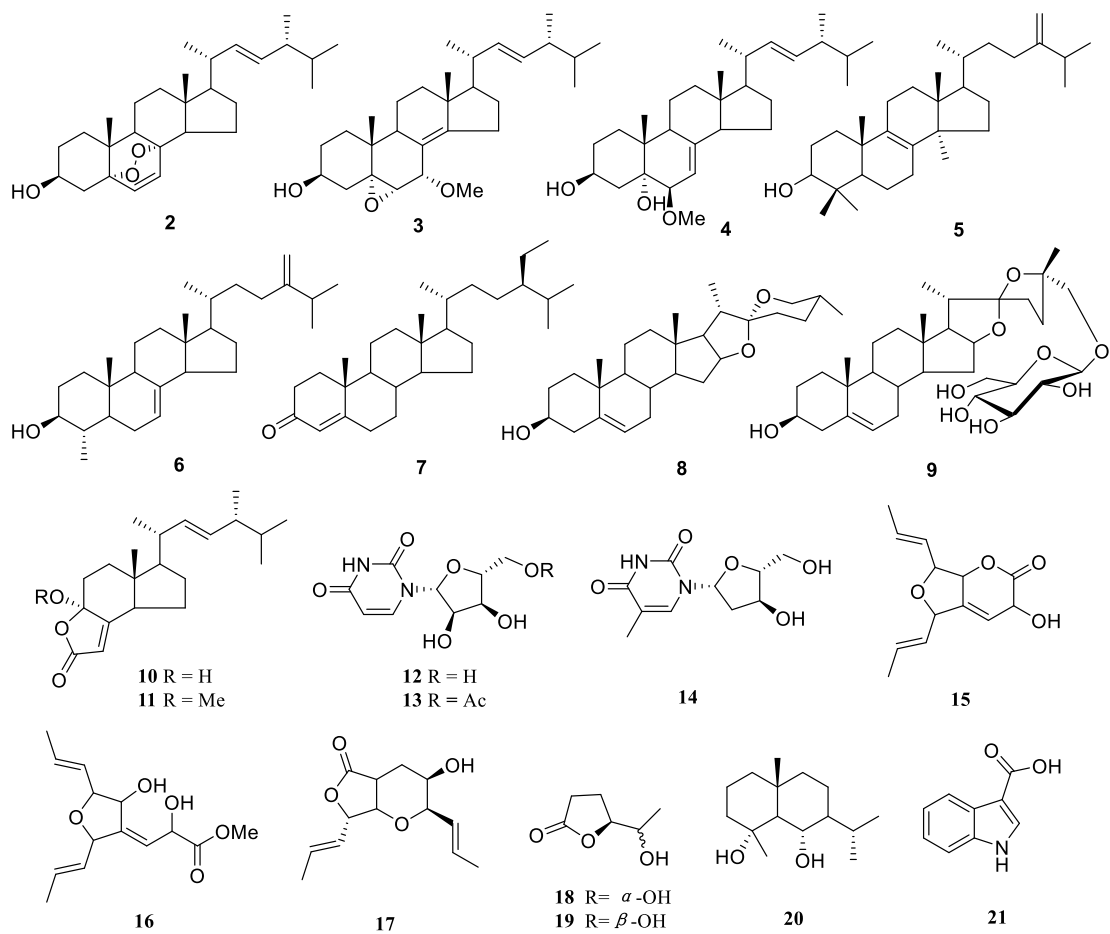

**Figure S3.** Chemical structures of all isolated known compounds (2–21).

FSQ1-6H

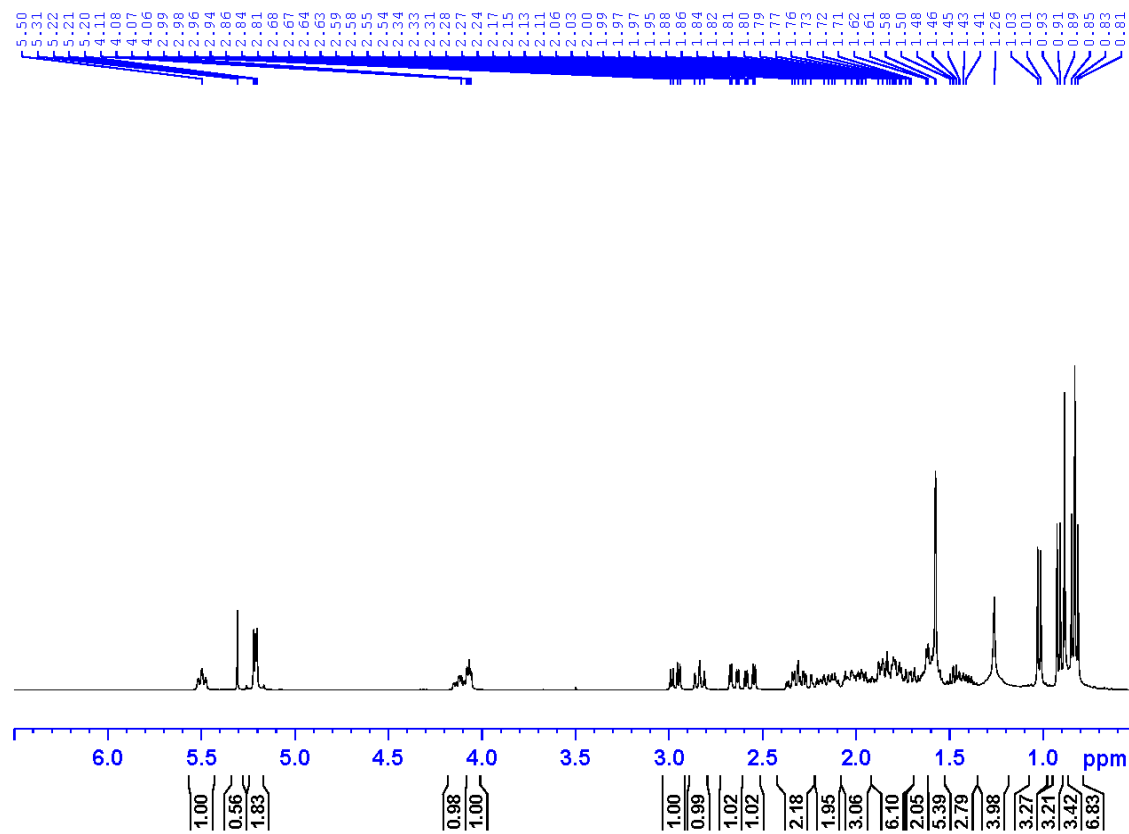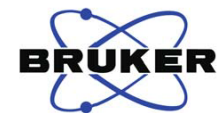

```
Current Data Parameters
NAME          fsq1-6
EXPNO         1
PROCNO        1

F2 - Acquisition Parameters
Date_         20170525
Time_        17.21
INSTRUM      spect
PROBHD       5 mm PABBO BB-
PULPROG      zg30
TD           65536
SOLVENT      CDCl3
NS           47
DS           2
SWH          8223.685 Hz
FIDRES       0.123493 Hz
AQ           3.9845889 sec
RG           203
DW           60.800 usec
DE           6.50 usec
TE           296.6 K
D1           1.0000000 sec
TD0          1

===== CHANNEL f1 =====
NUC1         1H
P1           13.09 usec
PL1          -1.00 dB
PLL1         12.14314651 W
SFO1         400.1324710 MHz

F2 - Processing parameters
SI           32768
SF           400.1300001 MHz
WDW          EM
SSB          0
LB           0.30 Hz
GB           0
PC           1.00
```

Figure S4.  $^1\text{H}$  NMR spectrum of compound **1** in  $\text{CDCl}_3$ .

fsq1-6C

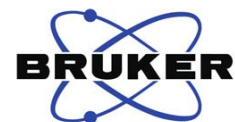

Current Data Parameters  
NAME fsq1-6  
EXPNO 2  
PROCNO 1

F2 - Acquisition Parameters  
Date\_ 20170525  
Time\_ 17.29  
INSTRUM spect  
PROBHD 5 mm PABBO BB-  
PULPROG zgpg30  
TD 65536  
SOLVENT CDCl3  
NS 2053  
DS 4  
SWH 24038.461 Hz  
FIDRES 0.366798 Hz  
AQ 1.3631488 sec  
RG 203  
DW 20.800 usec  
DE 6.50 usec  
TE 296.7 K  
D1 2.00000000 sec  
D11 0.03000000 sec  
TD0 1

==== CHANNEL f1 =====  
NUC1 13C  
P1 12.37 usec  
PL1 1.00 dB  
PL1W 28.13319778 W  
SF01 100.6228298 MHz

==== CHANNEL f2 =====  
CPDPRG[2] waltz16  
NUC2 1H  
PCPD2 80.00 usec  
PL2 -1.00 dB  
PL12 14.72 dB  
PL13 14.50 dB  
PL2W 12.14314651 W  
EL12W 0.32533529 W  
EL13W 0.34224036 W  
SF02 400.1316005 MHz

F2 - Processing parameters  
SI 32768  
SF 100.6127687 MHz  
WDW EM  
SSB 0  
LB 1.00 Hz  
GB 0  
PC 1.40

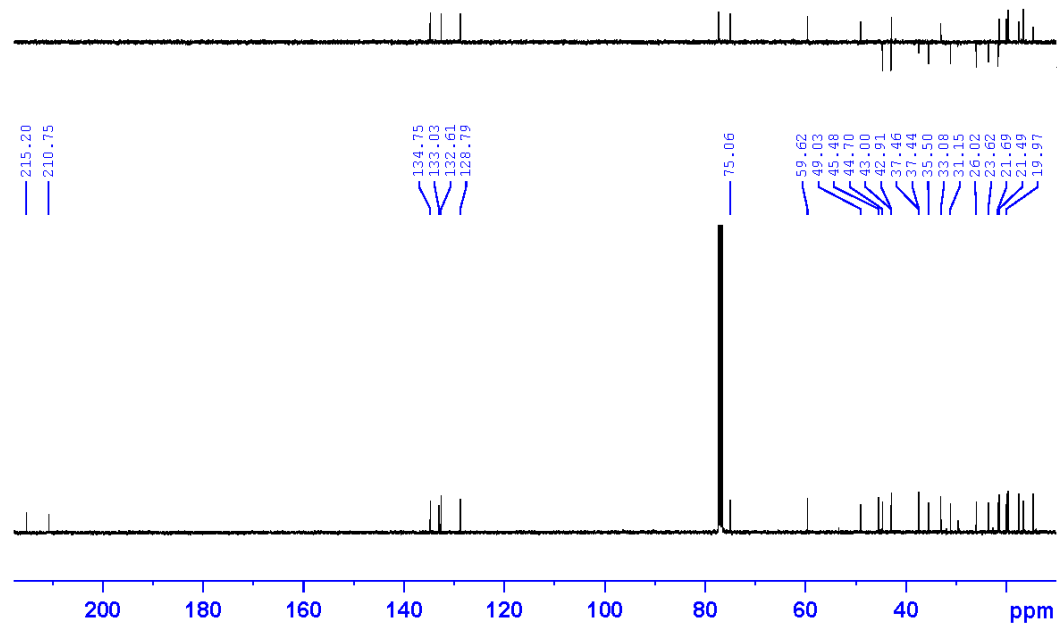

Figure S5. <sup>13</sup>C NMR spectrum of compound 1 in CDCl<sub>3</sub>.

fsq1-6

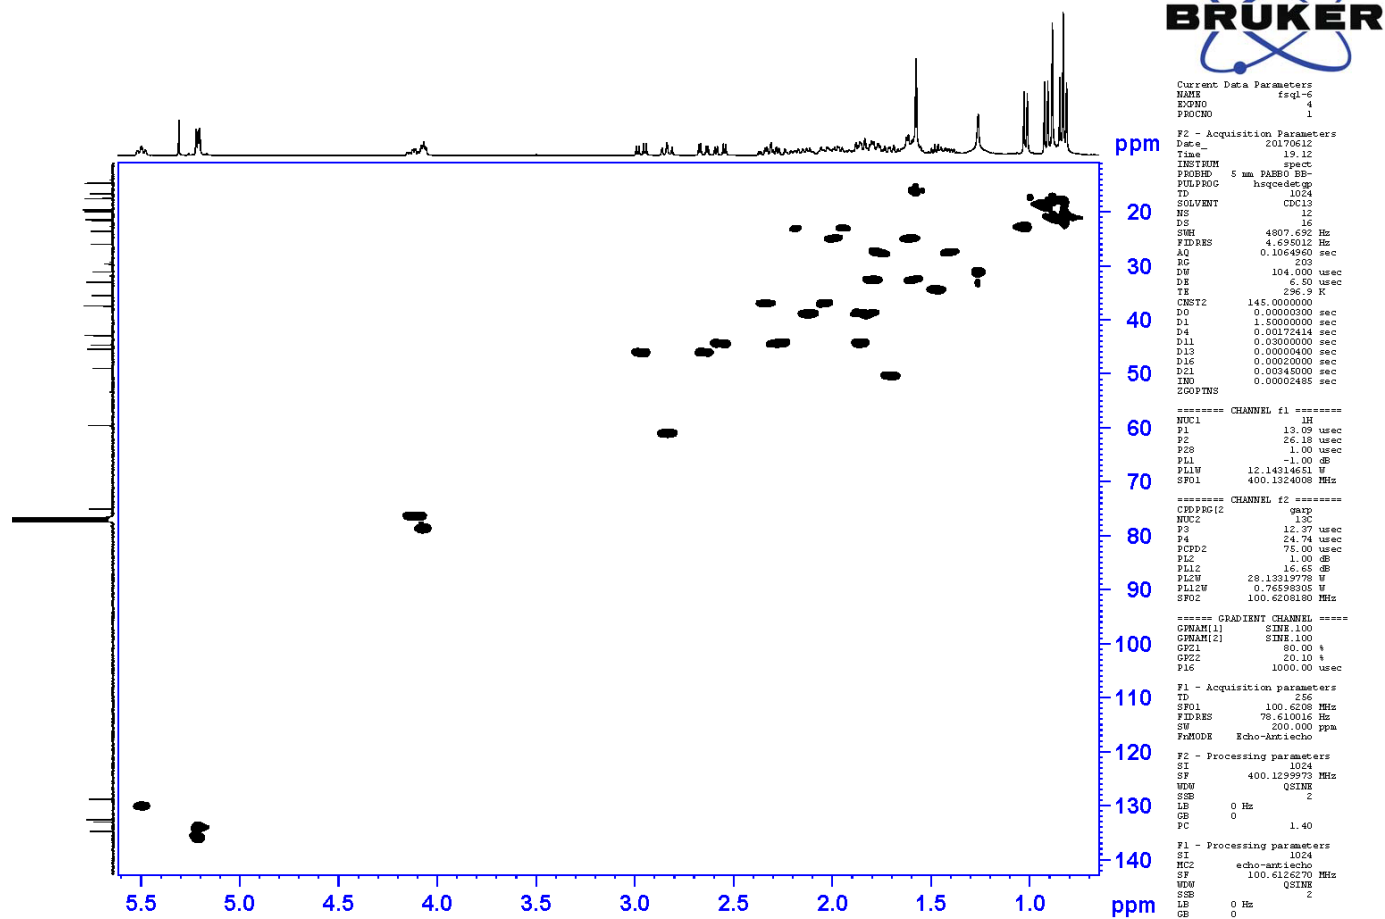

Figure S6. HSQC NMR spectrum of compound **1** in CDCl<sub>3</sub>.

fsq1-6 H-H

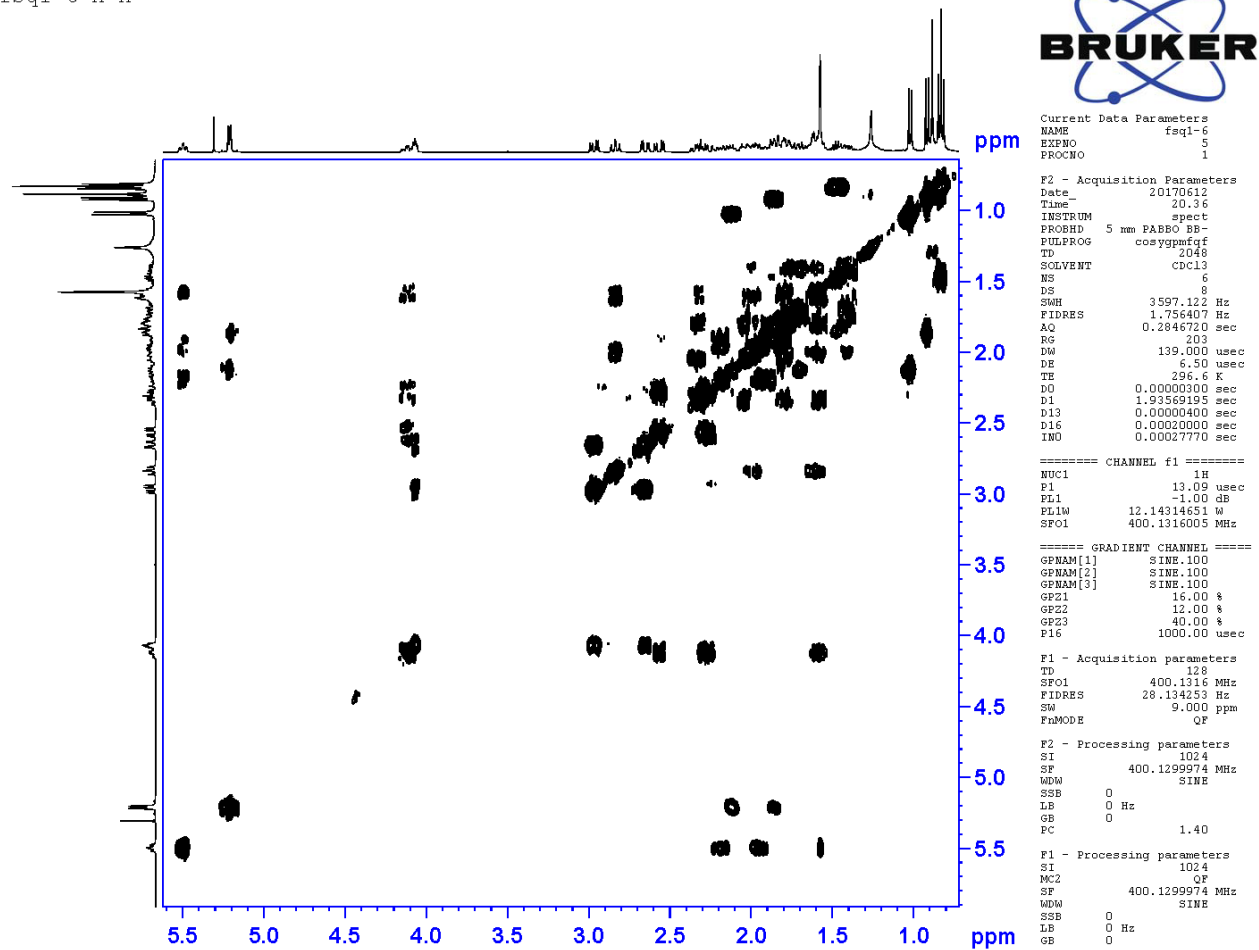

Figure S7.  $^1\text{H}$ - $^1\text{H}$  COSY NMR spectrum of compound **1** in  $\text{CDCl}_3$ .

fsq1-6 bc

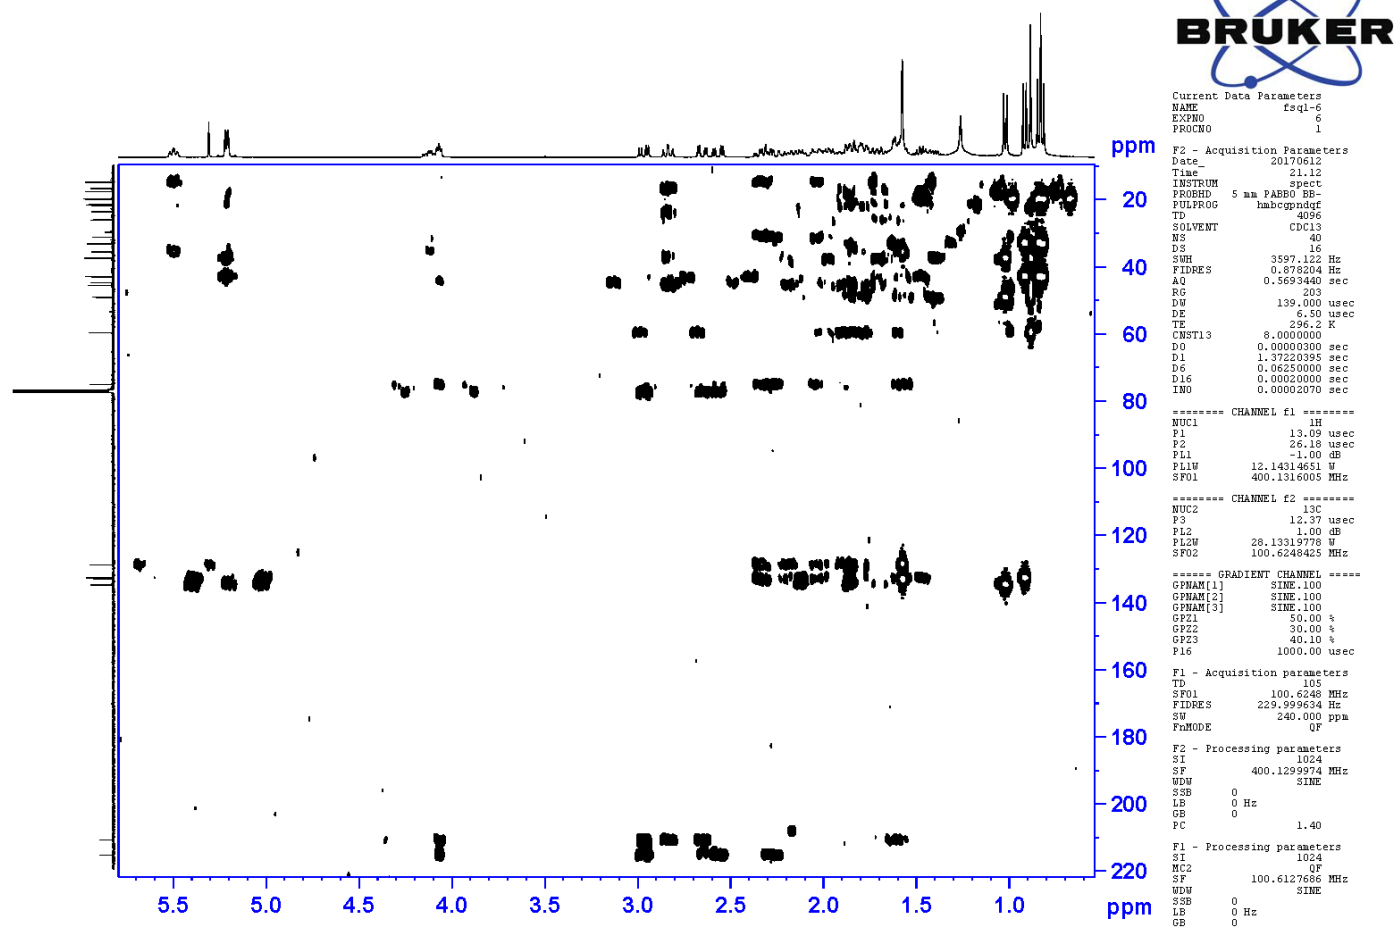

Figure S8. HMBC NMR spectrum of compound **1** in CDCl<sub>3</sub>.

fsq1-6 NOESY

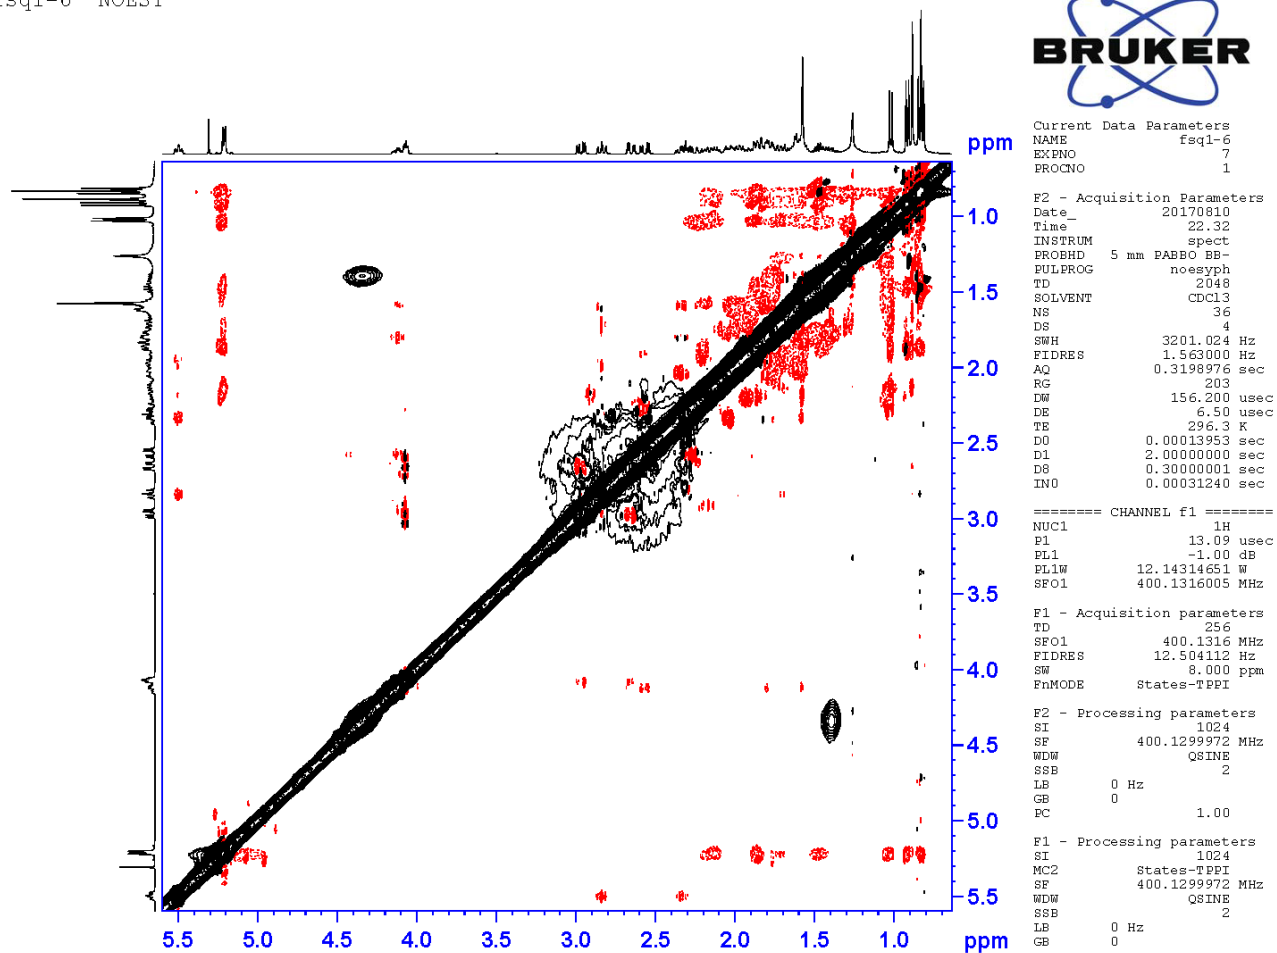

Figure S9. NOESY NMR spectrum of compound **1** in CDCl<sub>3</sub>.
